# Supplementary material for: The effect of secondary structures on the NLO properties of single chain oligopeptides: a comparison between β-strand and α-helix polyglycines
Source: Royal Society of Chemistry journal article supplement (doi:10.1039/c3cp51496j), 2013-01-01
Supplement: c3cp51496j.pdf [file c3cp51496j.pdf]

Cite this: DOI: 10.1039/c0xx00000x

www.rsc.org/xxxxxx

## Effect of secondary structure on NLO properties of single chain oligopeptides: a comparison between $\beta$ -strand and $\alpha$ -helix polyglycines

Andrea Alparone,<sup>\*a</sup>

Received (in XXX, XXX) Xth XXXXXXXXX 20XX, Accepted Xth XXXXXXXXX 20XX

DOI: 10.1039/b000000x

### ELECTRONIC SUPPLEMENTARY INFORMATION

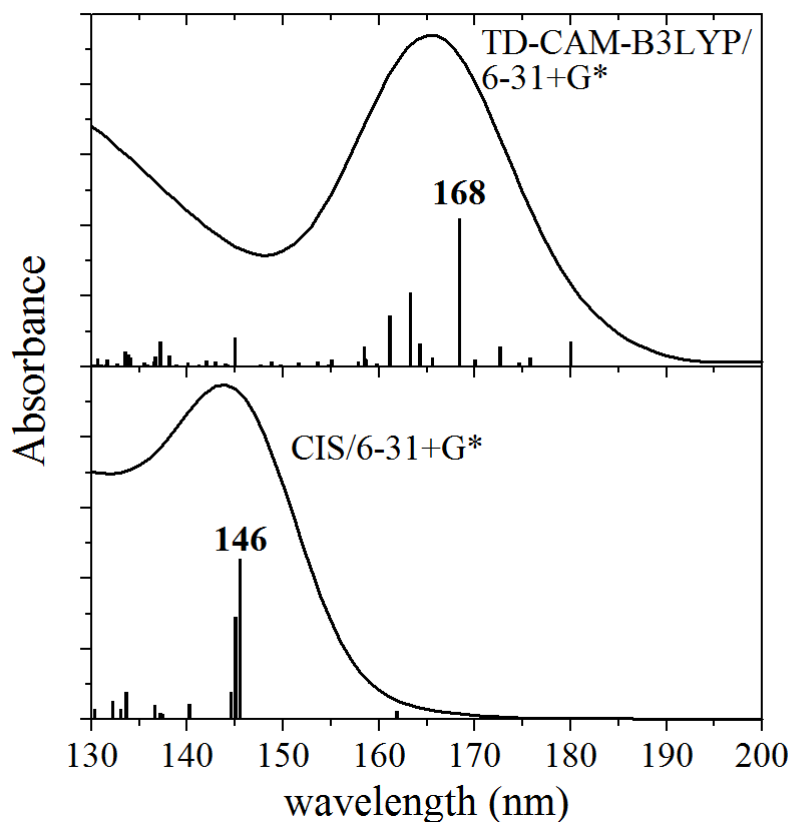

**Fig. S1** Calculated electronic absorption spectra of the  $\text{H}_2\text{N}-(\text{CH}_2-\text{CO}-\text{NH})_3-\text{CH}_2-\text{COOH}$   $\beta$ -strand.

<sup>a</sup> Department of Chemistry, University of Catania, viale A. Doria 6,  
Catania - 95125, Italy; Phone: 0039-95-7385008; Fax: 0039-95-580138;  
E-mail: agalparone@unict.it
